# Supplementary material for: Targeting JNK pathway promotes human hematopoietic stem cell expansion
Source: PubMed Central journal article supplement (PMC6323118; doi:10.1038/s41421-018-0072-8), 2019-01-08
Supplement: 41421_2018_72_MOESM1_ESM.pdf [file 41421_2018_72_MOESM1_ESM.pdf]

## **Supplementary Figures**

Fig.S1: Summary of JNK-IN-8 effect on HSPC expansion, related to Fig.1 and Fig.2

Fig.S2: Summary of lineage distribution of repopulated cells in primary recipients, related to Fig.3.

Fig.S3: Summary of c-Jun inhibition on HSPC expansion, related to Fig.5.

## **Supplementary Tables**

Table S1. Effect of J8 on enriched phenotypic hematopoietic stem and progenitor cell populations after 10 days in culture (20, 000 initiating cells were cultured), related to Fig. 1 and Fig. S1.

Table S2. Effect of J8 on CB-derived CD34<sup>+</sup> hematopoietic stem and progenitor cell expansion on day 10, related to Fig. 2.

Table S3. Summary of human engraftment in the BM of NPG recipients, related to Fig. 3, Fig.4 and Fig. S2. (see supplemental excel files)

Table S3 (A). Summary of human engraftment in primary NPG recipient BM at 21 weeks post transplantation, related to Fig. 3 and Fig. S2.

Table S3 (B). Summary of human engraftment in secondary NPG recipient BM at 21 weeks post transplantation, related to Fig. 4.

Table S4. Effect of c-Jun knockdown on CB-derived CD34<sup>+</sup> hematopoietic stem and progenitor cell expansion, related to Fig.5 and Fig. S3.

Table S4 (A). Summary of effect of *c-Jun* knockdown on CFUs, related to Fig.5.

Table S4 (B). Summary of effect of *c-Jun* knockdown on engraftment 19 weeks post transplantation, related to Fig.S3.

Table S5. List for qPCR primers, related to Material and methods.

**Fig. S1**

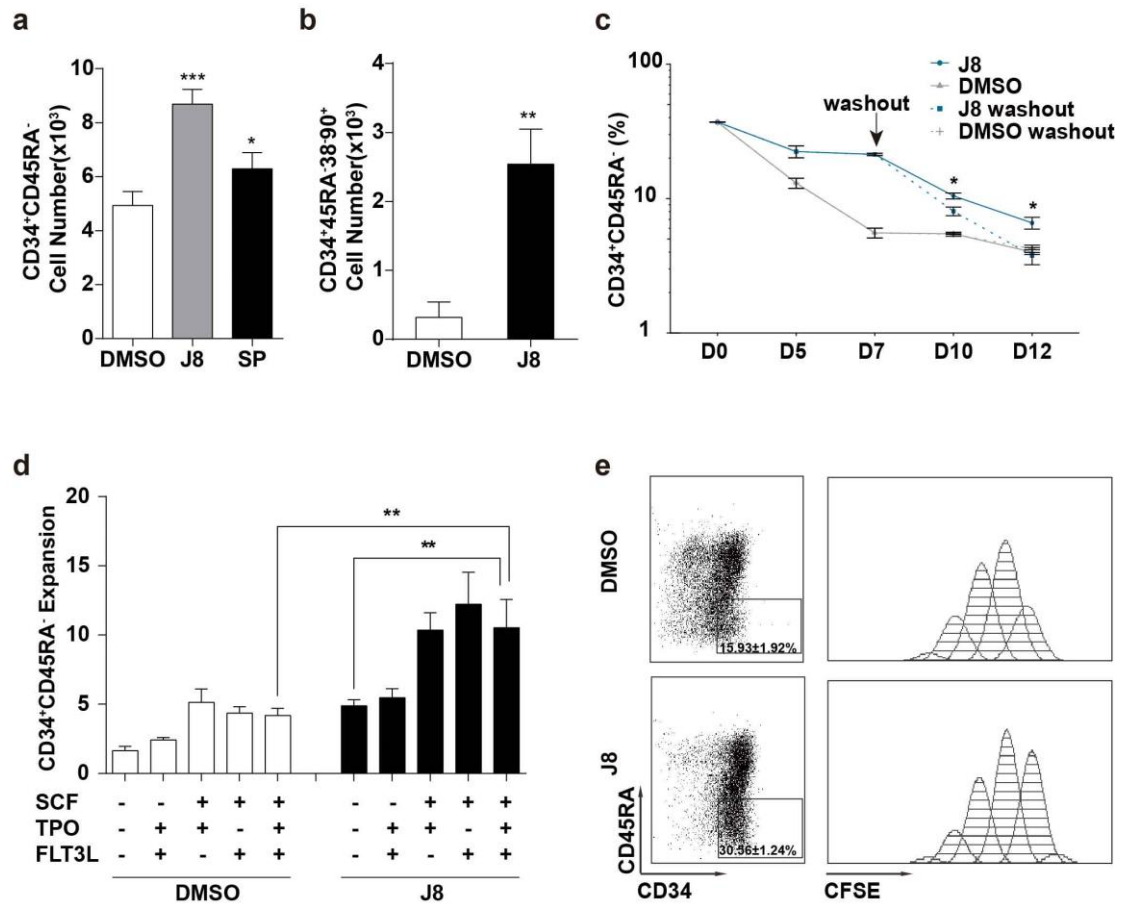

**Fig.S1: Summary of JNK-IN-8 effect on HSPC expansion, related to Fig.1 and Fig.2**

- Cell number of CD34<sup>+</sup>CD45RA<sup>-</sup> subsets after 7-day culture of 100,000 fresh CD34<sup>+</sup> cells in the presence of DMSO, J8 (2μM) or SP600125 (5μM) (n=3 experiments).
- Cell number of CD34<sup>+</sup>CD45RA<sup>-</sup>CD38<sup>-</sup>CD90<sup>+</sup> subsets after 10-day culture of 10,000 fresh CD34<sup>+</sup> cells in the presence of DMSO or J8 (2μM) (n=3 experiments).
- Change of CD34<sup>+</sup>CD45RA<sup>-</sup> population frequency after washout of J8 (2μM) or DMSO on day 7 CD34<sup>+</sup> cells which were cultured for further 5 days (n=3 experiments) (This data was drawn by R).
- CD34<sup>+</sup>CD45RA<sup>-</sup> population expansion calculated on day 7 in CD34<sup>+</sup> cells cultured with J8 (2μM) or DMSO in the serum free medium in the absence or presence of indicated cytokines (n=3 experiments).
- Proliferation of DMSO or J8-cultured CD34<sup>+</sup> cells, characterized by flow cytometry on day 4 after CFSE labelling.

All data shown as mean values ± SD. Statistical significance was assessed using unpaired t-test, where \*p < 0.05 and \*\*p < 0.01. See also Supplementary Table S2.

**Fig. S2**

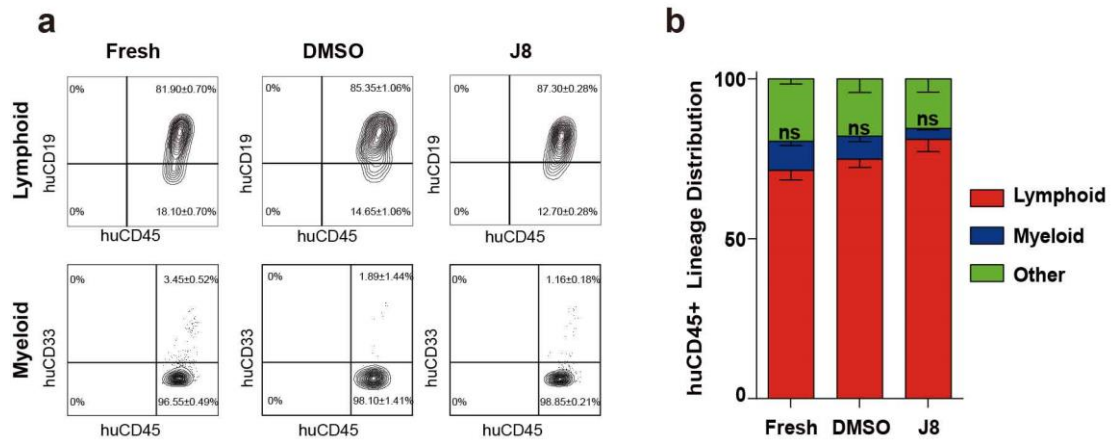

**Fig.S2: Summary of lineage distribution of repopulated cells in primary recipients, related to Fig.3.**

- Representative flow plots showing myeloid (CD33<sup>+</sup>) and lymphoid (CD19<sup>+</sup>) reconstitution of fresh-isolated, DMSO and J8-cultured CD34<sup>+</sup> cells in the BM of primary recipients 21 weeks post transplantation.
- Lineage distribution of human CD45<sup>+</sup> cells in the primary recipient mice BM 21 weeks after transplantation among fresh, DMSO and J8-cultured CD34<sup>+</sup> cells. Lymphoid, CD19<sup>+</sup> cells; Myeloid, CD33<sup>+</sup> cells; Other, cell population other than CD19<sup>+</sup> and CD33<sup>+</sup> cells. ns, not significant. Details see Supplementary Table S3(A). All data shown as mean values ± SD. Statistical significance was assessed using unpaired t-test.

**Fig. S3**

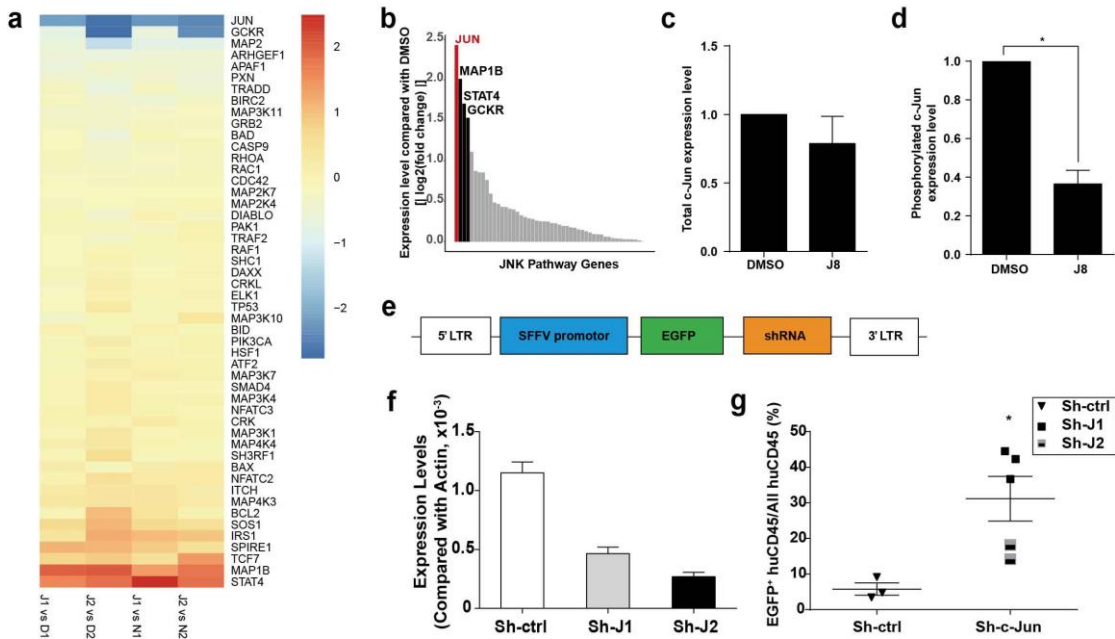

**Fig.S3: Summary of c-Jun inhibition on HSPC expansion, related to Fig.5.**

- Heat map showing JNK pathway genes' relative expression of CD34<sup>+</sup> cells after 7-day culture supplemented with J8 (J1 and J2 indicate 2 replicates of J8-treated cells), DMSO (D1 and D2 indicate 2 replicates of DMSO-treated cells) or only cytokines (N1 and N2 indicate 2 replicates of cytokines-only-cultured cells) (This data was drawn by R).
- The absolute value of the log<sub>2</sub> change ratio of JNK pathway gene expression level of J8-treated day7 CD34<sup>+</sup> cells compared with DMSO-treated day7 CD34<sup>+</sup> cells (This data was drawn by R).
- Quantification of relative protein expression of total c-Jun in CD34<sup>+</sup> cells cultured with DMSO or J8 following serum stimulation for 30 minutes (n=3 experiments, p=0.2046).
- Quantification of relative protein expression of phosphorylated c-Jun for DMSO and J8-treated CD34<sup>+</sup> cells following serum stimulation for 30 minutes. (n=3 experiments, p=0.0117)
- Schematic view of *c-Jun* shRNA construct.
- Relative *c-Jun* mRNA expression of indicated transduced CD34<sup>+</sup> cells on day 5 after transduction (n=2 experiments).
- EGFP<sup>+</sup> cell frequency in total human CD45<sup>+</sup> cell population in the PB of mice recipients that injected with scrambled shRNA-transduced (Sh-ctrl) or c-Jun shRNA-transduced (Sh-c-Jun) 50,000 day 5 CD34<sup>+</sup> cells 19 weeks after transplantation (n=5 mice from two independent experiments). See also Table S4B. Sh-ctrl, CD34<sup>+</sup> cells transduced with scrambled shRNA; Sh-J1, CD34<sup>+</sup> cells transduced with 1# c-Jun shRNA; Sh-J2, CD34<sup>+</sup> cells transduced with 2# c-Jun shRNA. See also Supplementary Table S4 (B).

All data shown as mean values  $\pm$  SD. Statistical significance was assessed using unpaired t-test, where \*p < 0.05.

**Table S1. Effect of J8 on enriched phenotypic hematopoietic stem and progenitor cell populations after 10 days in culture (20, 000 initiating cells were cultured), related to Fig. 1 and Fig. S1.**

| Concentration | Total cells<br>(x10 <sup>4</sup> ) | CD34 <sup>+</sup><br>(x10 <sup>4</sup> ) | CD34 <sup>+</sup> CD45RA <sup>-</sup><br>( x10 <sup>4</sup> ) | CD34 <sup>+</sup> CD45RA <sup>-</sup> CD38 <sup>-</sup> CD90 <sup>+</sup><br>(x10 <sup>4</sup> ) | CD34 <sup>+</sup> CD45RA <sup>-</sup> CD38 <sup>-</sup> CD90 <sup>+</sup> CD49f <sup>+</sup><br>(x10 <sup>4</sup> ) |
|---------------|------------------------------------|------------------------------------------|---------------------------------------------------------------|--------------------------------------------------------------------------------------------------|---------------------------------------------------------------------------------------------------------------------|
| 0             | 184.5                              | 82.82131                                 | 7.255147                                                      | 0.088513                                                                                         | 0.088513                                                                                                            |
| 0.1μM         | 142                                | 71.13575                                 | 5.697974                                                      | 0.060968                                                                                         | 0.060968                                                                                                            |
| 0.2μM         | 187.5                              | 89.4345                                  | 7.637706                                                      | 0.33835                                                                                          | 0.230755                                                                                                            |
| 0.5μM         | 180                                | 101.2176                                 | 9.585307                                                      | 0.461053                                                                                         | 0.282626                                                                                                            |
| 1μM           | 158.5                              | 88.84099                                 | 8.271096                                                      | 0.354003                                                                                         | 0.177001                                                                                                            |
| 1.2μM         | 150                                | 87.0861                                  | 9.405299                                                      | 0.298148                                                                                         | 0.161596                                                                                                            |
| 1.4μM         | 169.5                              | 97.96761                                 | 13.9114                                                       | 0.93902                                                                                          | 0.408474                                                                                                            |
| 1.5μM         | 153.5                              | 93.00258                                 | 12.64835                                                      | 0.155575                                                                                         | 0.144529                                                                                                            |
| 1.6μM         | 145                                | 92.97603                                 | 12.83069                                                      | 0.677461                                                                                         | 0.399024                                                                                                            |
| 1.8μM         | 110                                | 68.14456                                 | 10.22168                                                      | 0.627611                                                                                         | 0.226568                                                                                                            |
| 2μM           | 150.5                              | 94.1528                                  | 17.22996                                                      | 0.404904                                                                                         | 0.309752                                                                                                            |
| 2.5μM         | 139.5                              | 80.50908                                 | 11.5128                                                       | 0.484689                                                                                         | 0.231681                                                                                                            |
| 3μM           | 100                                | 63.4382                                  | 14.7811                                                       | 0.6415                                                                                           | 0.34641                                                                                                             |
| 4μM           | 69.5                               | 43.94777                                 | 13.49197                                                      | 0.348093                                                                                         | 0.246102                                                                                                            |
| 5μM           | 52                                 | 30.72753                                 | 13.3972                                                       | 0.377801                                                                                         | 0.302996                                                                                                            |
| 10μM          | 11                                 | 5.085806                                 | 3.071827                                                      | 0.078639                                                                                         | 0.063697                                                                                                            |

**Table S2. Effect of J8 on CB-derived CD34<sup>+</sup> hematopoietic stem and progenitor cell expansion on day 10, related to Fig. 2.**

| Colony type | CFU/1,000 fresh CD34 <sup>+</sup> cells | CFU frequency/1,000 cells on day 10 |                   | Fold increase (J8 VS. DMSO) |
|-------------|-----------------------------------------|-------------------------------------|-------------------|-----------------------------|
|             |                                         | DMSO cultured cells                 | J8 cultured cells |                             |
| G           | 46.0±13.0                               | 29.8±7.4                            | 19.4±10.1         | 0.7                         |
| M           | 18.7±6.1                                | 158.3±60                            | 89.4±55.8         | 0.6                         |
| GM          | 98.3±2.4                                | 67.7±6.6                            | 102.5±18.3        | 1.5                         |
| GEMM        | 5.3±0.5                                 | 12.6±17.8                           | 57.0±27.6         | 4.5                         |
| BFU-E       | 43±5.1                                  | 7.7±8.0                             | 19.1±9.8          | 2.5                         |
| CFU-E       | 38.3±2.4                                | 28.9±3.0                            | 33.3±7.5          | 1.2                         |
| Total       | 249.7±11.6                              | 50.0±9.9                            | 60.2±8.9          | 1.2                         |

**Table S3. Summary of human engraftment in the BM of NPG recipients, related to Fig. 3, Fig.4 and Fig. S2. (see supplemental excel files)**

Table S3 (A). Summary of human engraftment in primary NPG recipient BM at 21 weeks post transplantation, related to Fig. 3 and Fig. S2.

Table S3 (B). Summary of human engraftment in secondary NPG recipient BM at 21 weeks post transplantation, related to Fig. 4.

**Table S3 (A) Summary of human engraftment in primary NPG recipients BM at 21 weeks post transplantation, related to Fig. 3 and Fig. S2.**

| mouse ID    | injection dose of day 0 equivalent CD34+ cells | CD45 (%) | B cell (%) | Myeloid cell (%) |
|-------------|------------------------------------------------|----------|------------|------------------|
| 0630 *O1 2# | 10000                                          | 46.9     | 87.9       | 1.65             |
| 0630 O1 3#  | 10000                                          | 62.6     | 84.8       | 4.69             |
| 0630 O1 4#  | 10000                                          | 43.5     | 86.6       | 1.45             |
| 0630 O2 1#  | 2000                                           | 35.2     | 88.3       | 1                |
| 0630 O2 2#  | 2000                                           | 25.1     | 86.2       | 3.73             |
| 0630 O2 3#  | 2000                                           | 12.6     | 89.8       | 2.02             |
| 0630 O2 4#  | 2000                                           | 25.7     | 87.7       | 0.5              |
| 0630 O2 5#  | 2000                                           | 0.96     | 18.5       | 0                |
| 0630 O3 1#  | 200                                            | 0.58     | 0.93       | 2.8              |
| 0630 O3 2#  | 200                                            | 0.58     | 0          | 0                |
| 0630 O3 3#  | 200                                            | 0.33     | 0          | 1.25             |
| 0630 O3 4#  | 200                                            | 1.02     | 0          | 0                |
| 0701 *J1 1# | 10000                                          | 22.2     | 88.4       | 0.94             |
| 0701 J1 4#  | 10000                                          | 31.1     | 85.6       | 2.82             |
| 0701 J1 5#  | 10000                                          | 18.2     | 91         | 2.97             |
| 0710 J1 1#  | 10000                                          | 14.6     | 76         | 6.43             |
| 0710 J1 2#  | 10000                                          | 27.4     | 38.5       | 41               |
| 0710 J1 3#  | 10000                                          | 43.1     | 90.1       | 1.42             |
| 0701 J2 1#  | 2000                                           | 2.23     | 0.39       | 1.17             |
| 0701 J2 2#  | 2000                                           | 11.5     | 86.9       | 1.13             |
| 0701 J2 3#  | 2000                                           | 30       | 91.5       | 0.58             |
| 0701 J2 4#  | 2000                                           | 46.6     | 92         | 0.73             |
| 0710 J2 1#  | 2000                                           | 5.57     | 82.2       | 7.95             |
| 0710 J2 2#  | 2000                                           | 3.47     | 84.4       | 6.47             |
| 0710 J2 3#  | 2000                                           | 16       | 92.5       | 2.04             |
| 0701 J3 1#  | 200                                            | 1.28     | 0.52       | 1.55             |
| 0701 J3 2#  | 200                                            | 0.93     | 2.54       | 2.54             |
| 0701 J3 3#  | 200                                            | 1.29     | 0.7        | 0                |
| 0701 J3 4#  | 200                                            | 0.37     | 1.69       | 6.78             |
| 0710 J3 1#  | 200                                            | 1.17     | 70.3       | 5.07             |
| 0710 J3 2#  | 200                                            | 1.03     | 85.7       | 7.45             |
| 0710 J3 3#  | 200                                            | 0.6      | 0          | 0                |
| 0710 J3 4#  | 200                                            | 0.35     | 0          | 0                |
| 0701 *N1 2# | 10000                                          | 14.3     | 89.5       | 1.93             |
| 0701 N1 3#  | 10000                                          | 19.8     | 89.5       | 2.37             |
| 0701 N1 5#  | 10000                                          | 9.14     | 76.7       | 12.4             |
| 0710 N1 1#  | 10000                                          | 8.49     | 83.9       | 5.51             |
| 0710 N1 2#  | 10000                                          | 0.44     | 52.8       | 33.3             |
| 0710 N1 3#  | 10000                                          | 29.4     | 74.1       | 5.61             |
| 0701 N2 1#  | 2000                                           | 2.42     | 50.2       | 4.68             |
| 0701 N2 2#  | 2000                                           | 2.84     | 30.6       | 0.7              |
| 0701 N2 3#  | 2000                                           | 1.46     | 4.58       | 12.2             |
| 0710 N2 1#  | 2000                                           | 13.1     | 12.6       | 1.93             |
| 0710 N2 2#  | 2000                                           | 44.9     | 0          | 0.54             |
| 0710 N2 3#  | 2000                                           | 8.9      | 0          | 0                |
| 0701 N3 1#  | 200                                            | 1.21     | 0          | 33.3             |
| 0701 N3 2#  | 200                                            | 1.42     | 0.72       | 25.9             |
| 0710 N3 1#  | 200                                            | 0.34     | 0          | 3.77             |
| 0710 N3 3#  | 200                                            | 0.13     | 0          | 31.1             |
| 0710 N3 4#  | 200                                            | 1.31     | 77.7       | 8.03             |

\* All "J" denotes for mice that received CD34+ cells treated with J8 (2µM) plus cytokines;  
 all "N" denotes for mice that received CD34+ cells treated with DMSO plus cytokines;  
 all "O" denotes for mice that received freshly-isolated CD34+ cells

The value of the confidence choice entered was "0.95"

The value of the observed choice is "TRUE"

The value of the test\_unit\_slope choice is "TRUE"

The value of the test\_difference choice is "TRUE"

Limiting dilution data entered.

| Counter | Dose  | Tested | Response | Group |
|---------|-------|--------|----------|-------|
| 1       | 10000 | 6      | 6        | J8    |
| 2       | 2000  | 7      | 7        | J8    |
| 3       | 200   | 8      | 4        | J8    |
| 4       | 10000 | 6      | 5        | DMSO  |
| 5       | 2000  | 6      | 6        | DMSO  |
| 6       | 200   | 5      | 3        | DMSO  |
| 7       | 10000 | 3      | 3        | Fresh |
| 8       | 2000  | 5      | 4        | Fresh |
| 9       | 200   | 4      | 1        | Fresh |

The number of lines of data entered = 9

Confidence intervals for  
 1/(stem cell frequency)

| Group | Lower | Estimate | Upper |
|-------|-------|----------|-------|
| DMSO  | 4172  | 1712     | 703   |
| Fresh | 2999  | 1111     | 412   |
| J8    | 744   | 286      | 110   |

Overall test for differences in stem cell frequencies between any of the groups

| Chisq | DF | P.value |
|-------|----|---------|
| 9.08  | 2  | 0.0107  |

Pairwise tests for differences in stem cell frequencies

| Group 1 | Group 2 | Chisq | DF | Pr(>Chisq) |
|---------|---------|-------|----|------------|
| DMSO    | Fresh   | 0.509 | 1  | 0.475      |
| DMSO    | J8      | 9.07  | 1  | 0.0026     |
| Fresh   | J8      | 3.9   | 1  | 0.0482     |

Goodness of fit tests. These test whether the log-dose slope equals 1.

Rejection of the tests may be due either to batch effects (heterogeneity in the stem cell frequencies or assay success rate) or

Estimated slope is 0.43

| Test          | Chisq | DF | P Value  |
|---------------|-------|----|----------|
| Likelihood    | 11    | 1  | 0.000898 |
| Score test of | 63    | 1  | 2.04E-15 |



Table S3 (B) Summary of human engraftment in secondary NPG recipient BM at 21 weeks post transplantation, related to Fig.4.

| mouse ID  | injection dose of total cells in primary recipients' BM | injection dose of human CD34+ cells in primary recipients' BM | CD45 (%) |
|-----------|---------------------------------------------------------|---------------------------------------------------------------|----------|
| 1128 J1-1 | 1x10 <sup>7</sup>                                       | 707000                                                        | 14.3     |
| 1128 J1-2 | 1x10 <sup>7</sup>                                       | 707000                                                        | 2.18     |
| 1128 J1-3 | 1x10 <sup>7</sup>                                       | 707000                                                        | 23.7     |
| 1128 J1-5 | 1x10 <sup>7</sup>                                       | 707000                                                        | 60.2     |
| 1128 J2-1 | 1x10 <sup>6</sup>                                       | 70700                                                         | 0.79     |
| 1128 J2-2 | 1x10 <sup>6</sup>                                       | 70700                                                         | 0.29     |
| 1128 J2-3 | 1x10 <sup>6</sup>                                       | 70700                                                         | 0.77     |
| 1128 J2-4 | 1x10 <sup>6</sup>                                       | 70700                                                         | 2.77     |
| 1128 J2-5 | 1x10 <sup>6</sup>                                       | 70700                                                         | 1.7      |
| 1128 J3-2 | 5x10 <sup>5</sup>                                       | 35350                                                         | 0.47     |
| 1128 J3-3 | 5x10 <sup>5</sup>                                       | 35350                                                         | 1.44     |
| 1128 J3-4 | 5x10 <sup>5</sup>                                       | 35350                                                         | 1.02     |
| 1128 J3-5 | 5x10 <sup>5</sup>                                       | 35350                                                         | 0.36     |
| 1128 J4-1 | 1x10 <sup>5</sup>                                       | 7070                                                          | 0.65     |
| 1128 J4-2 | 1x10 <sup>5</sup>                                       | 7070                                                          | 1.19     |
| 1128 J4-3 | 1x10 <sup>5</sup>                                       | 7070                                                          | 0.73     |
| 1128 J4-4 | 1x10 <sup>5</sup>                                       | 7070                                                          | 1.25     |
| 1128 N1-1 | 1x10 <sup>7</sup>                                       | 365000                                                        | 0.99     |
| 1128 N1-2 | 1x10 <sup>7</sup>                                       | 365000                                                        | 2.05     |
| 1128 N1-3 | 1x10 <sup>7</sup>                                       | 365000                                                        | 5.24     |
| 1128 N2-1 | 1x10 <sup>6</sup>                                       | 36500                                                         | 0.88     |
| 1128 N3-1 | 5x10 <sup>5</sup>                                       | 18250                                                         | 0.72     |
| 1128 N3-2 | 5x10 <sup>5</sup>                                       | 18250                                                         | 0.83     |
| 1128 N4-1 | 1x10 <sup>5</sup>                                       | 3650                                                          | 0.53     |

+, All "J" denotes for mice that received bone marrow (BM) engrafts of CD34+ cells treated with J8 (2µM) plus cytokines from primary recipients;  
all "N" denotes for mice that received BM engrafts of CD34+ cells treated with DMSO plus cytokines from primary recipients

The value of the confidence choice entered was "0.95"  
The value of the observed choice is "TRUE"  
The value of the test\_unit\_slope choice is "TRUE"  
The value of the test\_difference choice is "TRUE"

Limiting dilution data entered.

| Counter | Dose   | Tested | Response | Group |
|---------|--------|--------|----------|-------|
| 1       | 707000 | 4      | 4        | J8    |
| 2       | 70700  | 5      | 2        | J8    |
| 3       | 35350  | 4      | 2        | J8    |
| 4       | 7070   | 4      | 2        | J8    |
| 5       | 365000 | 3      | 2        | DMSO  |
| 6       | 36500  | 1      | 0        | DMSO  |
| 7       | 18250  | 2      | 0        | DMSO  |
| 8       | 3650   | 1      | 0        | DMSO  |

The number of lines of data entered = 8

Confidence intervals for  
1/(stem cell frequency)

| Group | Lower   | Estimate | Upper |
|-------|---------|----------|-------|
| DMSO  | 1536125 | 374111   | 91112 |
| J8    | 157372  | 65714    | 27440 |

Overall test for differences in stem cell frequencies between any of the groups

| Chisq | DF | P.value |
|-------|----|---------|
| 5.02  | 1  | 0.0251  |

Goodness of fit tests. These test whether the log-dose slope equals 1.

Rejection of the tests may be due either to batch effects (heterogeneity in the stem cell frequencies or assay success rate) or to a failure of the stem cell hypothesis.

Estimated slope is 0.543

| Test                                      | Chisq | DF | P Value |
|-------------------------------------------|-------|----|---------|
| Likelihood ratio test of single-hit model | 2.07  | 1  | 0.15    |
| Score test of heterogeneity               | 0.101 | 1  | 0.75    |

**Table S4. Effect of c-Jun knockdown on CB-derived CD34<sup>+</sup> hematopoietic stem and progenitor cell expansion, related to Fig.5 and Fig. S3.**

Table S4 (A). Summary of effect of *c-Jun* knockdown on CFUs, related to Fig.5.

| Colony type | CFU frequency/5,000 cells on day 5 after transduction |                              |            |
|-------------|-------------------------------------------------------|------------------------------|------------|
|             | Scrambled (Sh-ctrl)                                   | <i>c-Jun</i> knockdown cells |            |
|             |                                                       | Sh-J1                        | Sh-J2      |
| G           | 2.3±3.3                                               | 0.7±0.9                      | 0.7±0.9    |
| M           | 26.3±5.4                                              | 13.7±5.2                     | 10.3±0.5   |
| GM          | 112.3±81.3                                            | 224.3±6.2                    | 200.3±11.3 |
| BFU-E       | 0.0±0.0                                               | 18.3±21.0                    | 1.7±1.2    |
| CFU-E       | 2.0±1.4                                               | 42.7±30.0                    | 31.7±1.2   |
| GEMM        | 0.0±0.0                                               | 1.7±0.9                      | 1.3±0.5    |

Table S4 (B). Summary of effect of *c-Jun* knockdown on engraftment 19 weeks post transplantation, related to Fig.S3.

| mouse ID     | GFP <sup>+</sup> CD45 <sup>+</sup> / All huCD45 <sup>+</sup> (%) |
|--------------|------------------------------------------------------------------|
| 1226 * SC1-2 | 11.6                                                             |
| 1226 SC1-4   | 3.4                                                              |
| 1226 SC1-5   | 2.39                                                             |
| 1226 * SJ1-1 | 33.9                                                             |
| 1226 SJ1-2   | 30.2                                                             |
| 1226 SJ1-3   | 35                                                               |
| 1226 * SJ2-4 | 11.6                                                             |
| 1226 SJ2-5   | 14.1                                                             |

\*: All "SC1" denotes mice injected with CD34<sup>+</sup> cells transduced with scrambled shRNA (sh-ctrl); all "SJ1" and "SJ2" denotes mice injected with CD34<sup>+</sup> cells transduced with shRNA targeting *c-Jun* (sh-J1 and sh-J2, respectively).

**Table S5. List for qPCR primers, related to Material and methods.**

|                          |                         |
|--------------------------|-------------------------|
| <i>β-Actin</i> _ Forward | GACAGCAGTCGGTTGGAGCG    |
| <i>β-Actin</i> _ Reverse | GGGACTTCCTGTAACAACGCATC |
| <i>c-Jun</i> _ Forward   | GTGACGGACTGTTCTATGACT   |
| <i>c-Jun</i> _ Reverse   | GGGTTACTGTAGCCATAAGGT   |
| <i>JUNB</i> _ Forward    | ACGACTCATACACAGCTACGG   |
| <i>JUNB</i> _ Reverse    | GCTCGGTTTCAGGAGTTTGTAGT |
| <i>JUND</i> _ Forward    | TCATCATCCAGTCCAACGGG    |
| <i>JUND</i> _ Reverse    | TTCTGCTTGTGTAAATCCTCCAG |
| <i>JNK1</i> _ Forward    | TGTGTGGAATCAAGCACCTTC   |
| <i>JNK1</i> _ Reverse    | AGGCGTCATCATAAACTCGTTC  |
| <i>JNK2</i> _ Forward    | GAAACTAAGCCGTCCTTTTCAGA |
| <i>JNK2</i> _ Reverse    | TCCAGCTCCATGTGAATAACCT  |
